# Supplementary material for: RNA-seq Brings New Insights to the Intra-Macrophage Transcriptome of Salmonella Typhimurium
Source: PubMed Central journal article supplement (PMC4643027; doi:10.1371/journal.ppat.1005262), 2015-11-12

**A.**

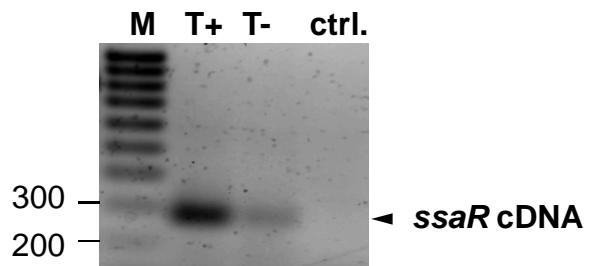

**B.**

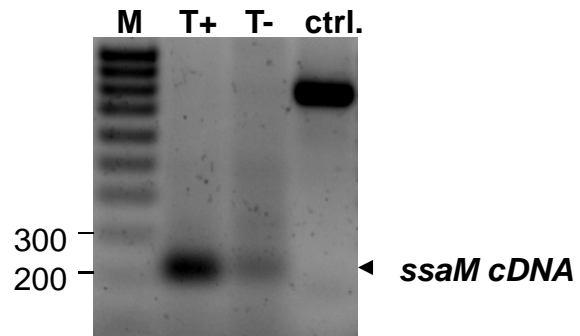

**C.**

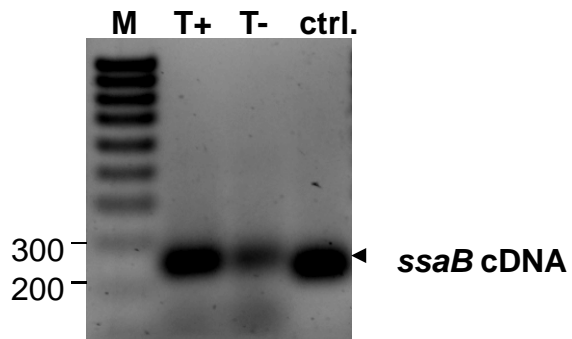

**D.**

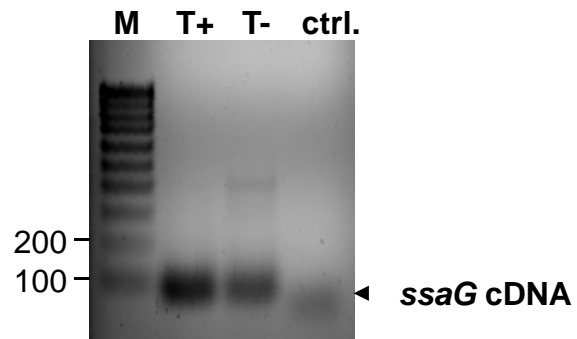

Supplement: ppat.1005262.s001.pdf [file ppat.1005262.s001.pdf]
