# Supplementary material for: RNA-seq Brings New Insights to the Intra-Macrophage Transcriptome of Salmonella Typhimurium
Source: PubMed Central journal article supplement (PMC4643027; doi:10.1371/journal.ppat.1005262), 2015-11-12

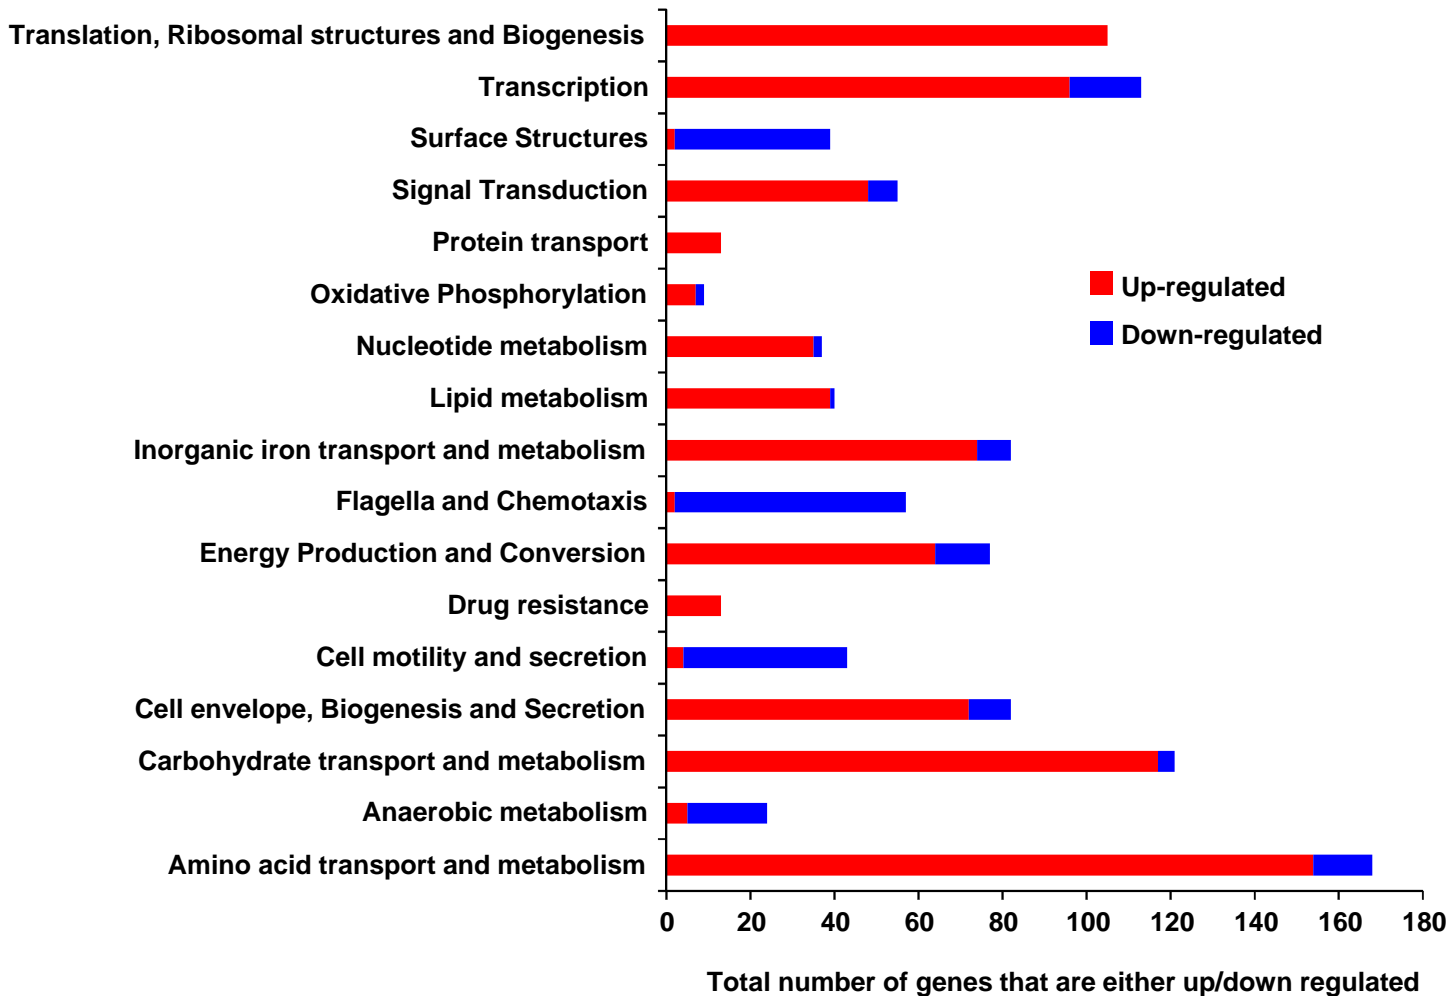

Supplement: ppat.1005262.s002.pdf [file ppat.1005262.s002.pdf]
